# Supplementary material for: Genotoxicity of Natural Water during the Mass Development of Cyanobacteria Evaluated by the Allium Test Method: A Model Experiment with Microcosms
Source: MDPI journal article supplement (doi:10.3390/toxins14050359), 2022-05-21
Supplement: s1 [file s1]

# Supplementary Materials: Genotoxicity of Natural Water during the Mass Development of Cyanobacteria Evaluated by the Allium Test Method: A Model Experiment with Microcosms

Dmitry S. Pesnya, Svetlana A. Kurbatova, Andrey N. Sharov, Ekaterina N. Chernova, Igor Yu. Yershov, Galina V. Shurganova and Ekaterina L. Vodeneeva

**Table S1.** Average concentration of MCs in cyanobacterial biomass (intracellular fraction), µg/L.

| Variant                                     | Gross formula                                                   | [M+H] <sup>+</sup> | Treatment |         |         |  |
|---------------------------------------------|-----------------------------------------------------------------|--------------------|-----------|---------|---------|--|
|                                             |                                                                 |                    | ZP        | Amph    | F       |  |
| July 19                                     |                                                                 |                    |           |         |         |  |
| [D-Asp <sup>3</sup> ]MC-LR                  | C <sub>48</sub> H <sub>72</sub> N <sub>10</sub> O <sub>12</sub> | 981.54             | 0.338     | 0.353   | 0.409   |  |
| MC-LR                                       | C <sub>49</sub> H <sub>74</sub> N <sub>10</sub> O <sub>12</sub> | 995.56             | 6.405     | 7.641   | 9.371   |  |
| [D-Glu-OCH <sub>3</sub> <sup>6</sup> ]MC-LR | C <sub>50</sub> H <sub>76</sub> N <sub>10</sub> O <sub>12</sub> | 1009.57            | 0.092     | 0.114   | 0.140   |  |
| [D-Asp <sup>3</sup> ]MC-RR                  | C <sub>48</sub> H <sub>73</sub> N <sub>13</sub> O <sub>12</sub> | 1024.56            | 0.006     | 0.006   | 0.014   |  |
| MC-LW                                       | C <sub>54</sub> H <sub>72</sub> N <sub>8</sub> O <sub>12</sub>  | 1025.54            | 0.020     | 0.024   | 0.035   |  |
| [Dha <sup>7</sup> ]MC-YR                    | C <sub>51</sub> H <sub>70</sub> N <sub>10</sub> O <sub>13</sub> | 1031.52            | 0.532     | 0.621   | 0.617   |  |
| MC-RR                                       | C <sub>49</sub> H <sub>75</sub> N <sub>13</sub> O <sub>12</sub> | 1038.57            | 0.039     | 0.000   | 0.075   |  |
| MC-YR                                       | C <sub>52</sub> H <sub>72</sub> N <sub>10</sub> O <sub>13</sub> | 1045.54            | 1.911     | 1.647   | 1.339   |  |
| Total                                       |                                                                 |                    | 9.343     | 10.405  | 12.001  |  |
| August 19                                   |                                                                 |                    |           |         |         |  |
| [D-Asp <sup>3</sup> ]MC-LR                  | C <sub>48</sub> H <sub>72</sub> N <sub>10</sub> O <sub>12</sub> | 981.54             | 0.222     | 0.056   | 0.454   |  |
| MC-LR                                       | C <sub>49</sub> H <sub>74</sub> N <sub>10</sub> O <sub>12</sub> | 995.56             | 0.123     | 0.076   | 0.683   |  |
| [D-Glu-OCH <sub>3</sub> <sup>6</sup> ]MC-LR | C <sub>50</sub> H <sub>76</sub> N <sub>10</sub> O <sub>12</sub> | 1009.57            | < 0.002   | < 0.002 | < 0.002 |  |
| [D-Asp <sup>3</sup> ]MC-RR                  | C <sub>48</sub> H <sub>73</sub> N <sub>13</sub> O <sub>12</sub> | 1024.56            | < 0.002   | < 0.002 | < 0.002 |  |
| MC-LW                                       | C <sub>54</sub> H <sub>72</sub> N <sub>8</sub> O <sub>12</sub>  | 1025.54            | < 0.002   | < 0.002 | < 0.002 |  |
| [Dha <sup>7</sup> ]MC-YR                    | C <sub>51</sub> H <sub>70</sub> N <sub>10</sub> O <sub>13</sub> | 1031.52            | 0.208     | 0.048   | 0.238   |  |

|       |                                                                 |         |       |       |       |
|-------|-----------------------------------------------------------------|---------|-------|-------|-------|
| MC-RR | C <sub>49</sub> H <sub>75</sub> N <sub>13</sub> O <sub>12</sub> | 1038.57 | 0.003 | 0.007 | 0.007 |
| MC-YR | C <sub>52</sub> H <sub>72</sub> N <sub>10</sub> O <sub>13</sub> | 1045.54 | 1.756 | 0.455 | 5.694 |
| Total |                                                                 |         | 2.311 | 0.641 | 7.076 |

Table S2. Average concentration of MCs in water, µg/L.

| Variant                                     | Gross formula                                                   | [M+H] <sup>+</sup> | Treatment |         |         |
|---------------------------------------------|-----------------------------------------------------------------|--------------------|-----------|---------|---------|
|                                             |                                                                 |                    | ZP        | Amph    | F       |
| July 19                                     |                                                                 |                    |           |         |         |
| [D-Asp <sup>3</sup> ]MC-LR                  | C <sub>48</sub> H <sub>72</sub> N <sub>10</sub> O <sub>12</sub> | 981.54             | 0.006     | 0.006   | 0.003   |
| MC-LR                                       | C <sub>49</sub> H <sub>74</sub> N <sub>10</sub> O <sub>12</sub> | 995.56             | 0.007     | 0.091   | 0.082   |
| [D-Glu-OCH <sub>3</sub> <sup>6</sup> ]MC-LR | C <sub>50</sub> H <sub>76</sub> N <sub>10</sub> O <sub>12</sub> | 1009.57            | 0.054     | 0.071   | 0.064   |
| [D-Asp <sup>3</sup> ]MC-RR                  | C <sub>48</sub> H <sub>73</sub> N <sub>13</sub> O <sub>12</sub> | 1024.56            | < 0.002   | < 0.002 | < 0.002 |
| MC-LW                                       | C <sub>54</sub> H <sub>72</sub> N <sub>8</sub> O <sub>12</sub>  | 1025.54            | < 0.002   | < 0.002 | < 0.002 |
| [Dha <sup>7</sup> ]MC-YR                    | C <sub>51</sub> H <sub>70</sub> N <sub>10</sub> O <sub>13</sub> | 1031.52            | 0.006     | 0.005   | 0.003   |
| MC-RR                                       | C <sub>49</sub> H <sub>75</sub> N <sub>13</sub> O <sub>12</sub> | 1038.57            | < 0.002   | < 0.002 | < 0.002 |
| MC-YR                                       | C <sub>52</sub> H <sub>72</sub> N <sub>10</sub> O <sub>13</sub> | 1045.54            | 0.006     | 0.054   | 0.032   |
| Total                                       |                                                                 |                    | 0.080     | 0.228   | 0.184   |
| August 19                                   |                                                                 |                    |           |         |         |
| [D-Asp <sup>3</sup> ]MC-LR                  | C <sub>48</sub> H <sub>72</sub> N <sub>10</sub> O <sub>12</sub> | 981.54             | 0.015     | 0.017   | 0.011   |
| MC-LR                                       | C <sub>49</sub> H <sub>74</sub> N <sub>10</sub> O <sub>12</sub> | 995.56             | 0.063     | 0.085   | 0.043   |
| [D-Glu-OCH <sub>3</sub> <sup>6</sup> ]MC-LR | C <sub>50</sub> H <sub>76</sub> N <sub>10</sub> O <sub>12</sub> | 1009.57            | 0.027     | 0.026   | 0.047   |
| [D-Asp <sup>3</sup> ]MC-RR                  | C <sub>48</sub> H <sub>73</sub> N <sub>13</sub> O <sub>12</sub> | 1024.56            | < 0.002   | < 0.002 | < 0.002 |
| MC-LW                                       | C <sub>54</sub> H <sub>72</sub> N <sub>8</sub> O <sub>12</sub>  | 1025.54            | < 0.002   | < 0.002 | < 0.002 |
| [Dha <sup>7</sup> ]MC-YR                    | C <sub>51</sub> H <sub>70</sub> N <sub>10</sub> O <sub>13</sub> | 1031.52            | 0.012     | 0.012   | 0.005   |
| MC-RR                                       | C <sub>49</sub> H <sub>75</sub> N <sub>13</sub> O <sub>12</sub> | 1038.57            | < 0.002   | < 0.002 | < 0.002 |
| MC-YR                                       | C <sub>52</sub> H <sub>72</sub> N <sub>10</sub> O <sub>13</sub> | 1045.54            | 0.079     | 0.114   | 0.123   |
| Total                                       |                                                                 |                    | 0.197     | 0.254   | 0.229   |

Table S3. Genotoxicity data. Mann-Whitney test. (mean±SE).

| Treatment | Date    | Mitotic Indexes             | Phase Indexes                  |                                                 |                                                |                                | Polyploidy                                   | Mitotic Abnormalities                        | Micronuclei                 | Chromosomal Aberrations     |
|-----------|---------|-----------------------------|--------------------------------|-------------------------------------------------|------------------------------------------------|--------------------------------|----------------------------------------------|----------------------------------------------|-----------------------------|-----------------------------|
|           |         |                             | prophase                       | metaphase                                       | anaphase                                       | telophase                      |                                              |                                              |                             |                             |
| Control   | July 19 | 6.52 ± 0.54<br>(5.52; 7.36) | 45.18 ± 1.88<br>(41.87; 48.26) | 19.08 ± 2.36<br>(14.22; 22.60)                  | 19.89 ± 2.16<br>(16.00; 23.42)                 | 15.85 ± 1.73<br>(13.02; 18.69) | 0.02 ± 0.02<br>(0.00; 0.04)                  | 0.30 ± 0.13<br>(0.08; 0.49)                  | 0.04 ± 0.02<br>(0.00; 0.06) | 0.22 ± 0.14<br>(0.00; 0.41) |
| ZP        | July 19 | 5.66 ± 0.26<br>(5.29; 6.13) | 41.11 ± 2.92<br>(35.52; 45.62) | <b>27.78 ± 2.21*</b><br>( <b>23.67; 31.53</b> ) | 13.53 ± 1.00<br>(11.81; 15.13)                 | 17.59 ± 1.12<br>(15.45; 19.39) | <b>0.30 ± 0.09*</b><br>( <b>0.14; 0.44</b> ) | <b>2.51 ± 0.61*</b><br>( <b>1.51; 3.52</b> ) | 0.16 ± 0.05<br>(0.06; 0.24) | 0.31 ± 0.22<br>(0.00; 0.62) |
| Amph      | July 19 | 6.49 ± 1.29<br>(4.32; 8.66) | 39.53 ± 1.95<br>(36.25; 42.67) | 22.47 ± 1.60<br>(19.82; 25.07)                  | 18.24 ± 2.05<br>(15.19; 22.04)                 | 19.76 ± 2.22<br>(15.68; 23.36) | <b>0.20 ± 0.03*</b><br>( <b>0.12; 0.24</b> ) | 1.64 ± 0.86<br>(0.30; 3.23)                  | 0.08 ± 0.04<br>(0.00; 0.12) | 0.94 ± 0.30<br>(0.44; 1.43) |
| F         | July 19 | 7.88 ± 0.50<br>(6.97; 8.74) | 42.78 ± 1.79<br>(39.44; 45.42) | 28.17 ± 2.44<br>(23.47; 31.65)                  | <b>11.21 ± 1.00*</b><br>( <b>9.42; 12.90</b> ) | 17.84 ± 3.36<br>(13.40; 24.02) | <b>0.54 ± 0.18*</b><br>( <b>0.22; 0.82</b> ) | <b>2.49 ± 0.78*</b><br>( <b>1.19; 3.75</b> ) | 0.08 ± 0.05<br>(0.00; 0.12) | 0.93 ± 0.29<br>(0.34; 1.40) |
| Control   | Aug 19  | 7.52 ± 0.20<br>(7.22; 7.88) | 41.31 ± 1.11<br>(39.15; 42.99) | 25.36 ± 1.46<br>(22.61; 27.76)                  | 15.87 ± 1.03<br>(13.97; 17.58)                 | 17.46 ± 1.38<br>(15.24; 19.80) | 0.06 ± 0.02<br>(0.00; 0.08)                  | 0.20 ± 0.12<br>(0.00; 0.38)                  | 0.06 ± 0.02<br>(0.00; 0.08) | 0.24 ± 0.15<br>(0.00; 0.44) |
| ZP        | Aug 19  | 6.71 ± 0.54<br>(5.70; 7.59) | 40.11 ± 0.98<br>(38.43; 41.72) | 27.35 ± 0.64<br>(26.21; 28.44)                  | 17.16 ± 0.98<br>(15.32; 18.72)                 | 15.38 ± 1.42<br>(12.93; 17.83) | 0.16 ± 0.09<br>(0.00; 0.32)                  | 0.29 ± 0.21<br>(0.00; 0.58)                  | 0.08 ± 0.04<br>(0.00; 0.12) | 0.83 ± 0.35<br>(0.23; 1.45) |
| Amph      | Aug 19  | 7.35 ± 0.34<br>(6.70; 7.91) | 41.98 ± 0.78<br>(40.77; 43.34) | 25.93 ± 1.34<br>(23.29; 28.16)                  | 17.12 ± 0.63<br>(16.01; 18.23)                 | 14.97 ± 0.68<br>(13.90; 16.11) | 0.06 ± 0.02<br>(0.00; 0.08)                  | 0.09 ± 0.09<br>(0.00; 0.19)                  | 0.04 ± 0.02<br>(0.00; 0.06) | 0.50 ± 0.23<br>(0.10; 0.87) |
| F         | Aug 19  | 7.68 ± 0.38<br>(6.96; 8.23) | 39.51 ± 1.60<br>(36.94; 42.24) | 23.04 ± 1.15<br>(21.13; 24.92)                  | 16.49 ± 1.19<br>(14.34; 18.75)                 | 20.96 ± 1.25<br>(18.72; 23.17) | <b>0.18 ± 0.04*</b><br>( <b>0.10; 0.24</b> ) | <b>1.21 ± 0.50*</b><br>( <b>0.57; 2.16</b> ) | 0.06 ± 0.02<br>(0.00; 0.08) | 0.70 ± 0.37<br>(0.17; 1.36) |

Treatments: ZP – microcosms with only zooplankton, Amph – zooplankton and amphipods, F – zooplankton and fish. The differences that are significant in comparison with the control are highlighted in bold and with (\*). (x; y) - 95% confidence interval.

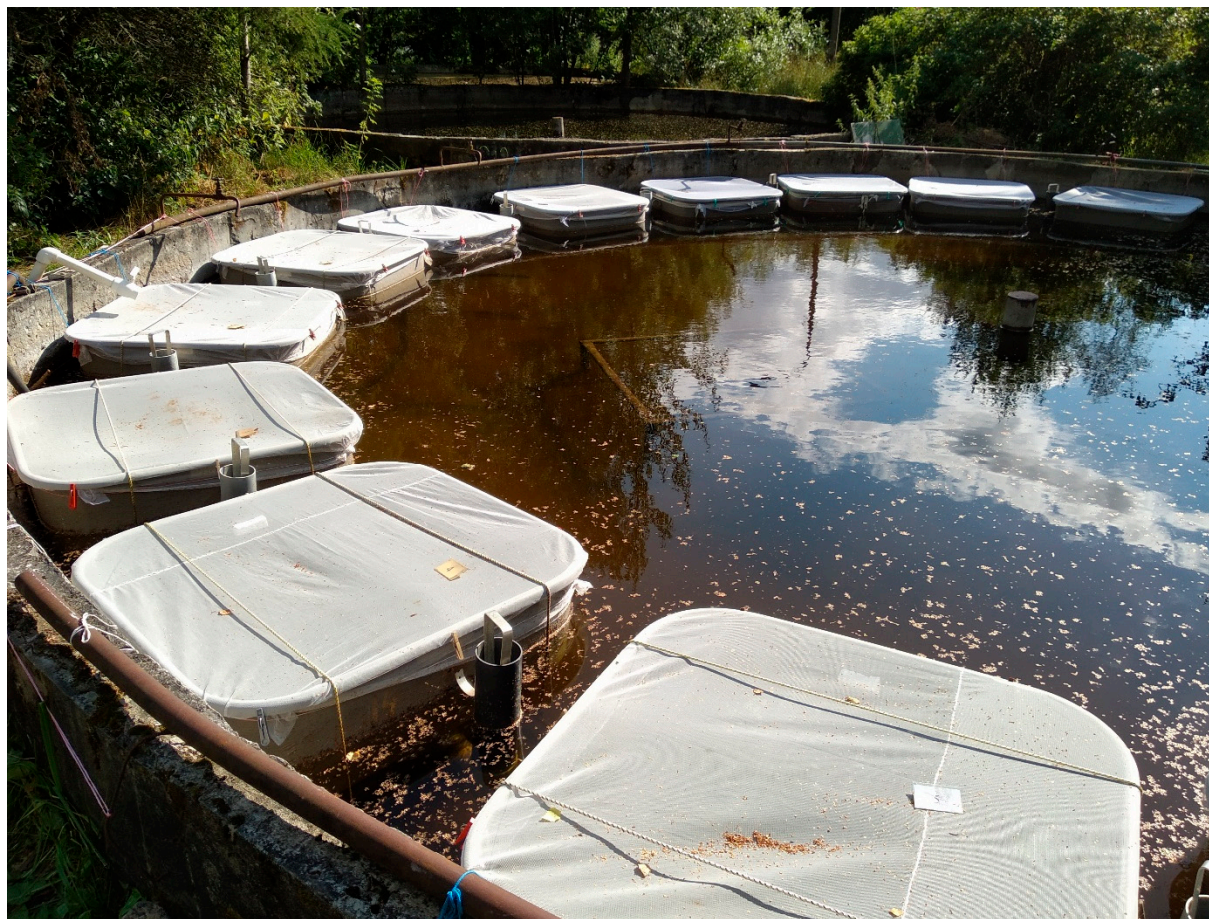

**Figure S1.** Photography (made at 20 July 2021) of the model experiment (microcosms) with different compositions of their biotic components in plastic fish-breeding containers (on the basis of Stationary of Experimental Field and Expeditionary Works of the Papanin Institute for Biology of Inland Waters Russian Academy of Sciences.).



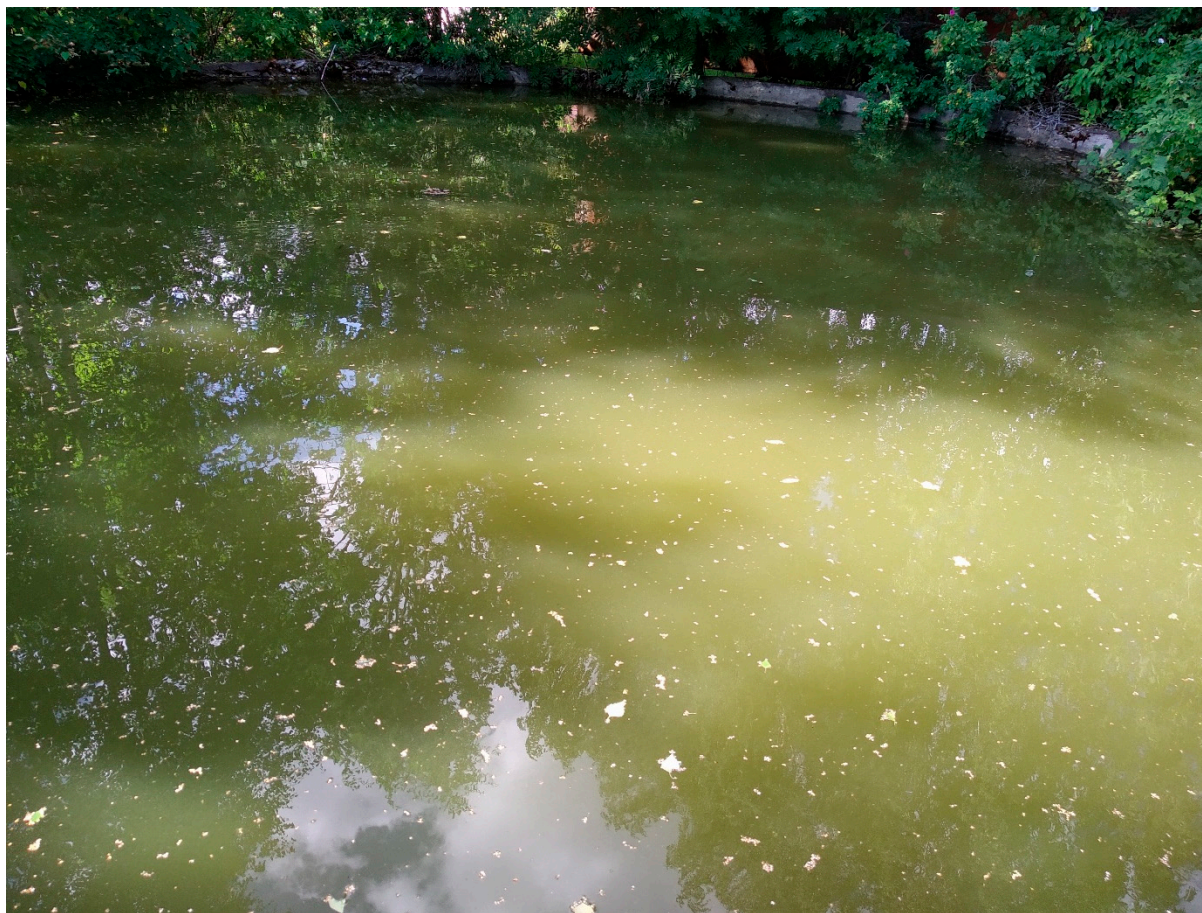

**Figure S2.** Photography (made at 20 July 2021) of pool with cyanobacterial blooming (on the basis of Stationary of Experimental Field and Expeditionary Works of the Papanin Institute for Biology of Inland Waters Russian Academy of Sciences.)
